# Supplementary material for: Acute focal brain damage alters mitochondrial dynamics and autophagy in axotomized neurons
Source: PubMed Central journal article supplement (PMC4260762; doi:10.1038/cddis.2014.511), 2014-11-27

# Supplementary Figure 1

**a**

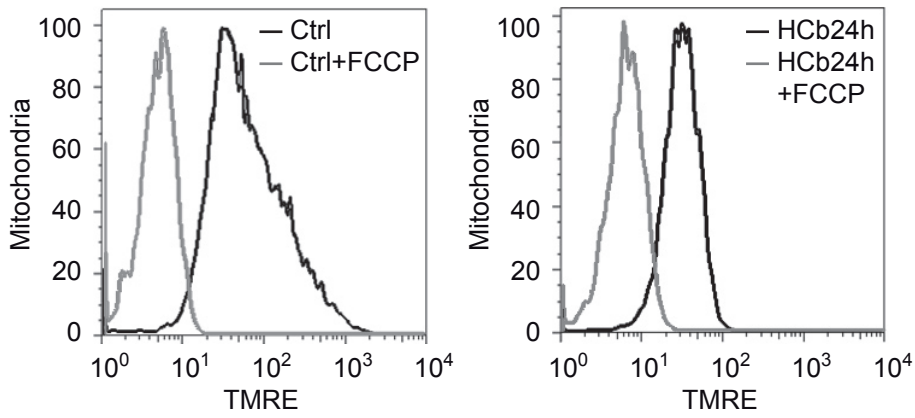

**b**

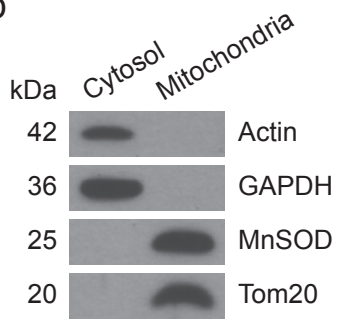

**c**

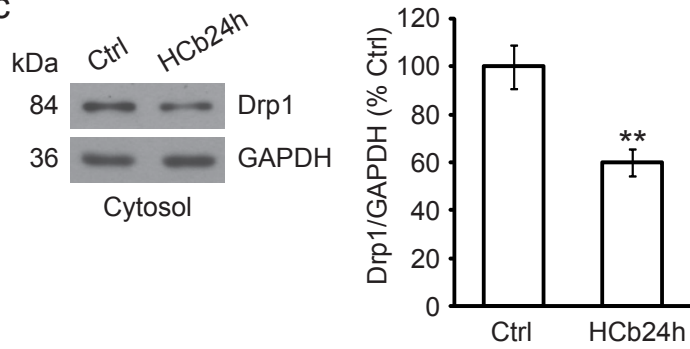

**d**

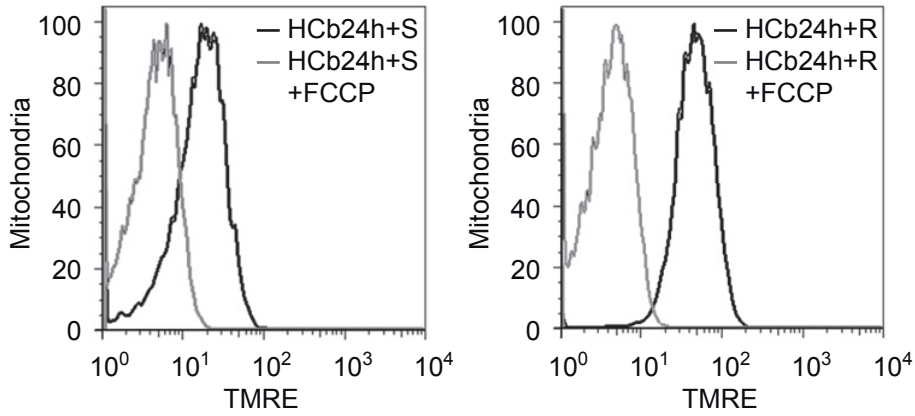

Supplement: cddis2014511x1.pdf [file cddis2014511x1.pdf]
